# Supplementary material
Source: PubMed Central journal article supplement (PMC6111169)

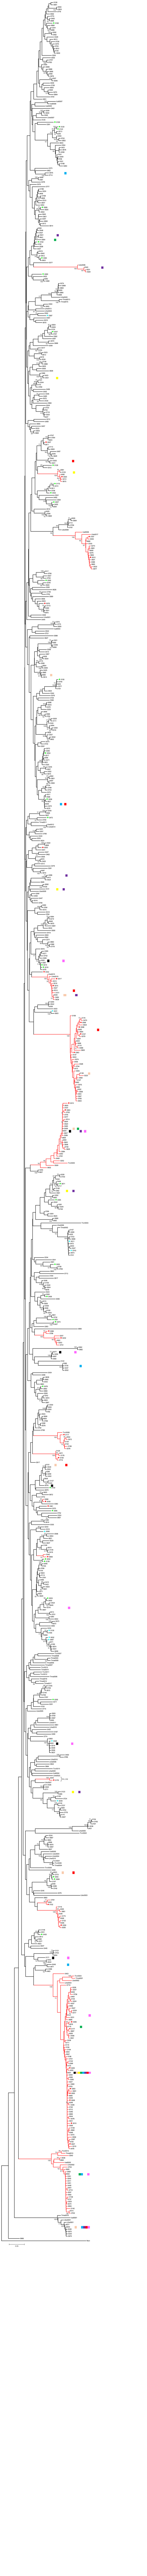

Supplement: rspb20180819supp3.pdf [file rspb20180819supp3.pdf]
